# Supplementary material
Source: PubMed Central journal article supplement (PMC2929722)
Supplement: JCI42550sd.pdf [file JCI42550sd.pdf]

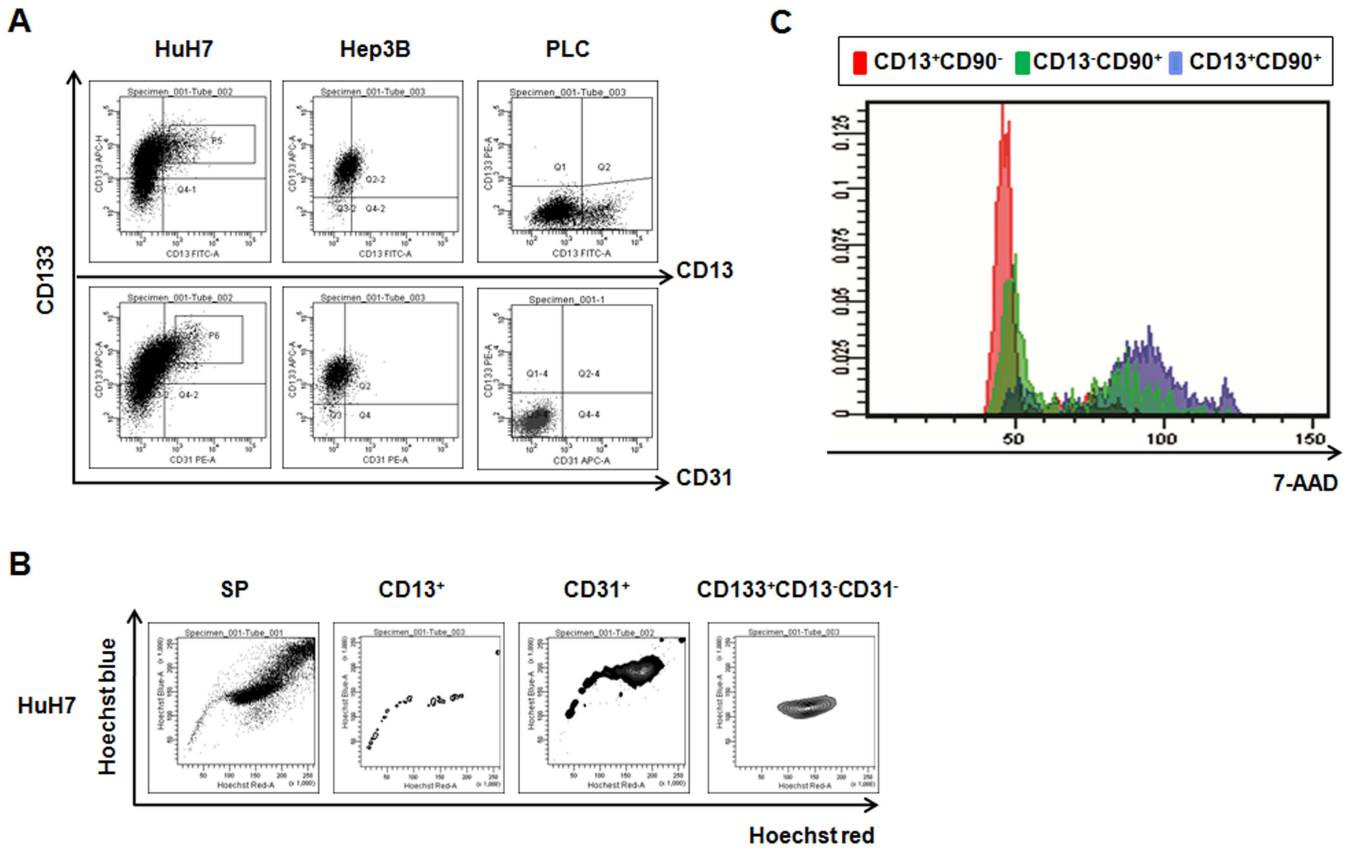

Figure S1. Evaluation of the CD31 expression and cell cycle status.

(A) The expression of the CD31 was assessed in HuH7, Hep3B, and PLC/PRF/5 cells.

There was no apparent expression of the CD31 in PLC/PRF/5 cells.

(B) The relations of the CD13 and SP fraction. The CD31+ cells mainly exists in G2/M/SP fraction.

(C) Cell cycle assay of the CD13+CD90-, CD13+CD90+, and CD13-CD90+ fractions of PLC/PRF/5 cells with 7-AAD.

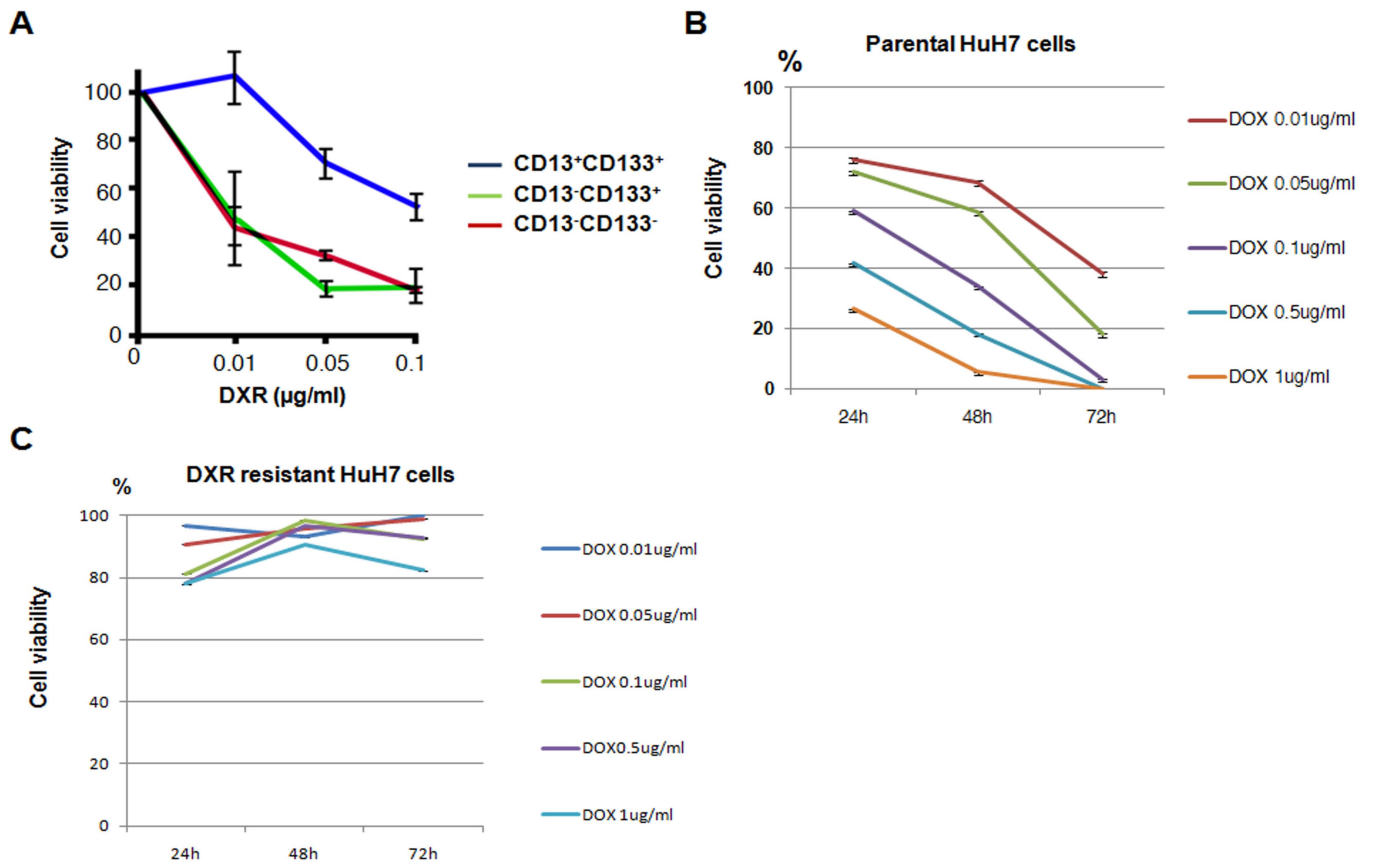

Figure S2. The CD13<sup>+</sup> cells resist chemotherapy.

- (A) Cell fractions CD13<sup>+</sup>CD133<sup>+</sup>, CD13<sup>-</sup>CD133<sup>+</sup>, and CD13<sup>-</sup>CD133<sup>-</sup> were isolated and the chemo-sensitivity was assessed in each fraction. Cells were treated with various concentrations of DXR for 72 h. Bars represent the error range.
- (B) Chemoresistance assay. Parental HuH7 cells were cultured in the medium with DXR as indicated and cell viability was analyzed.
- (C) Doxorubicin resistant (DXR-R) HuH7 cells were cultured in the medium with DXR as indicated and cell viability was analyzed.

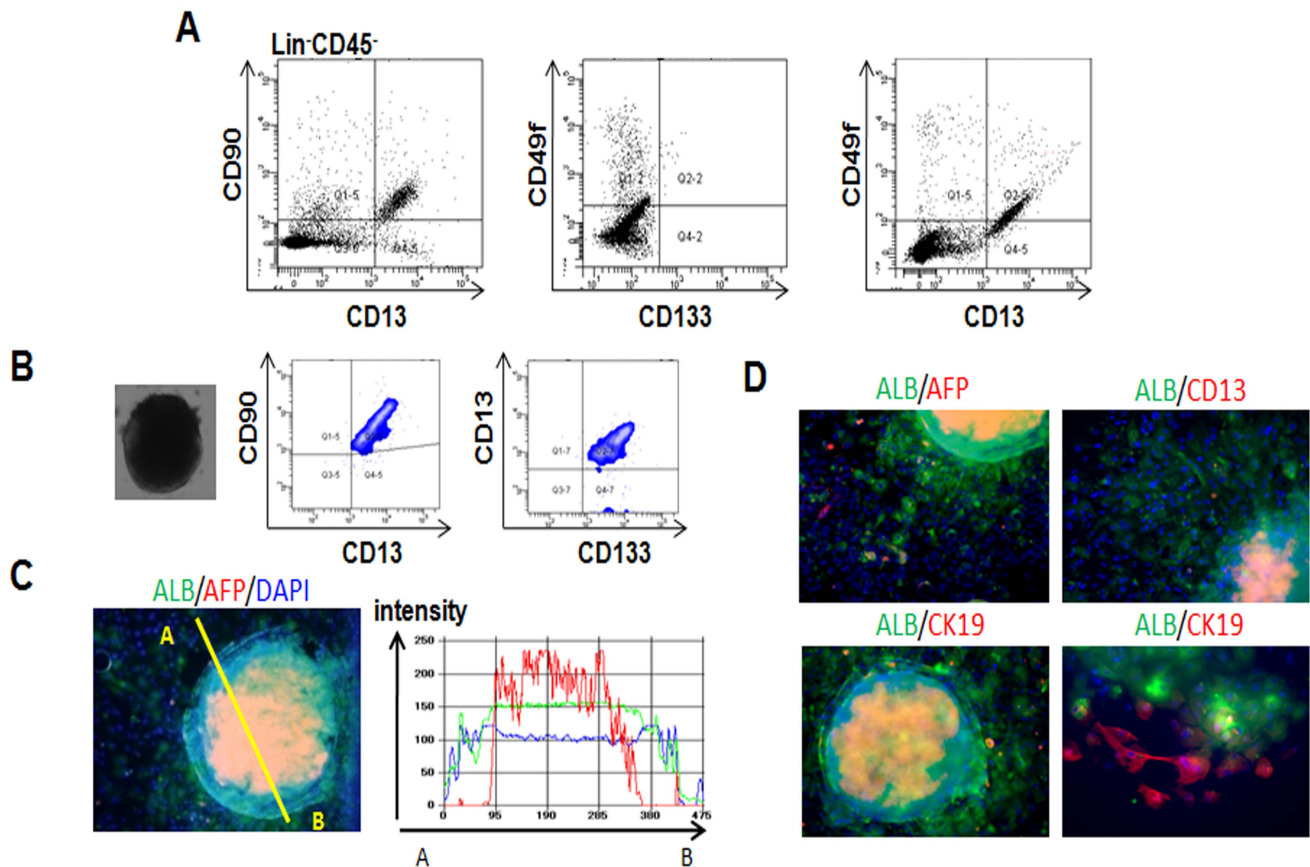

Figure S3. Enrichment of CD13+CD90+ normal hepatocytes in sphere formation, showing multi-differentiation potential

(A) Fresh normal hepatocytes, obtained in liver surgery, were analyzed for the CD13, CD90, and CD133 expression by multi-color flow cytometry.

(B) Multi-color flow cytometry indicated that normal hepatocyte sphere cells were predominantly CD13+CD90+CD133+.

(C) Multi-differentiation potential of normal hepatocyte sphere cells. Formed spheres were fixed and subjected to immunostaining with specific antibodies. The computed dissection analysis for differentiation markers detected the expression of albumin (blue) and alfa-fetoprotein (red) inside of spheres. Nuclei were stained by DAPI.

(D) The red staining indicates immature liver marker alfa-fetoprotein (the top left panel), cholangio-marker CD13 (the top right), cholangio-marker CD19 (the bottom pannels). Albumin, green.

Supplemental figure 4

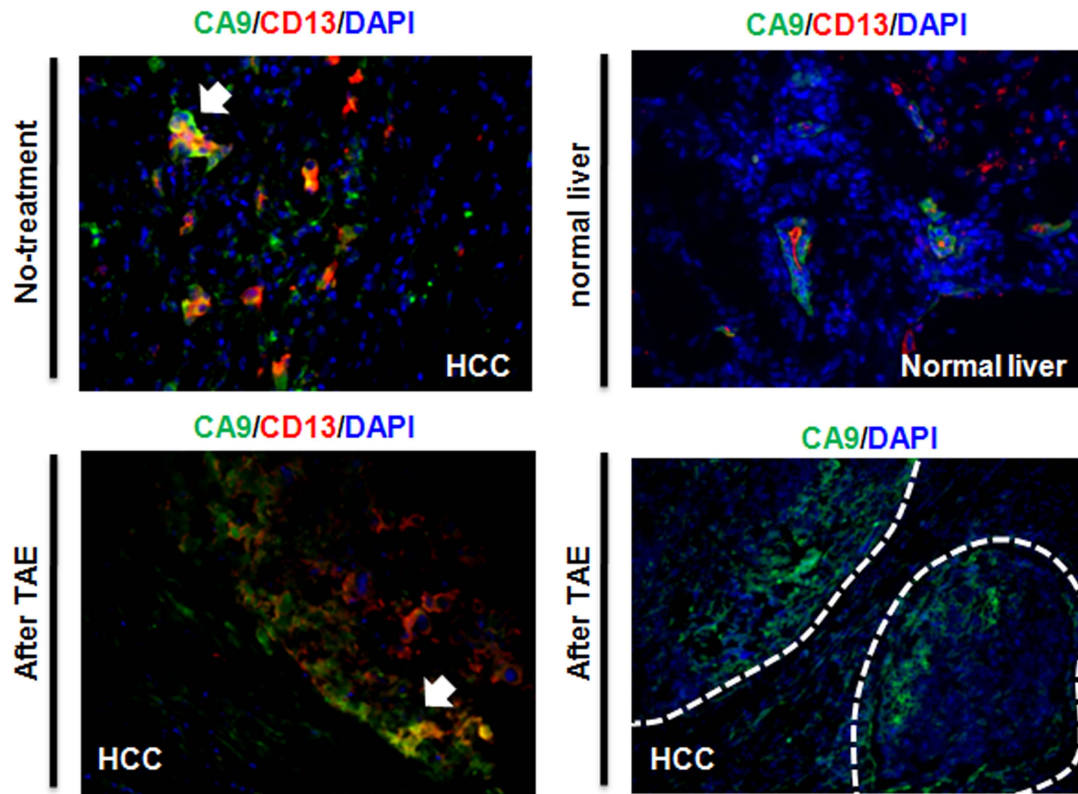

Figure S4. Evaluation of the expression of CA9 and CD13.

The expression of CD31 and hypoxia marker CA9 were assessed in no-treatment, after TAE and normal liver clinical samples. CD13 (red), CA9 (green) and nuclei (blue). The white dot lines indicate fibrous capsule and tumor cells exists inside of white dot circle. White arrow shows double positive cells of CD13 and CA9.

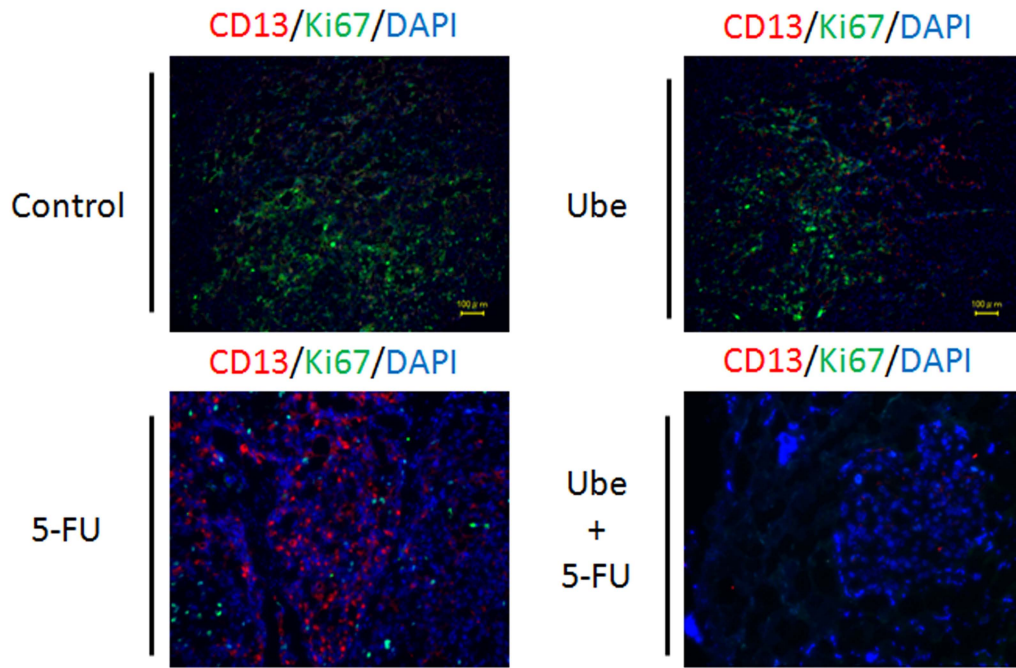

Figure S5. Evaluation of the CD13 and Ki67 expression in tumors of PLC/RLF/5 xenografted mice. The PLC/PRF/5 cells xenografted mice were treated with 5-FU, Ubenimex and Ubenimex plus 5-FU for 14 days. Enuclated tumors were stained with CD13 (red), Ki67 (green) and nuclei for DAPI (blue).

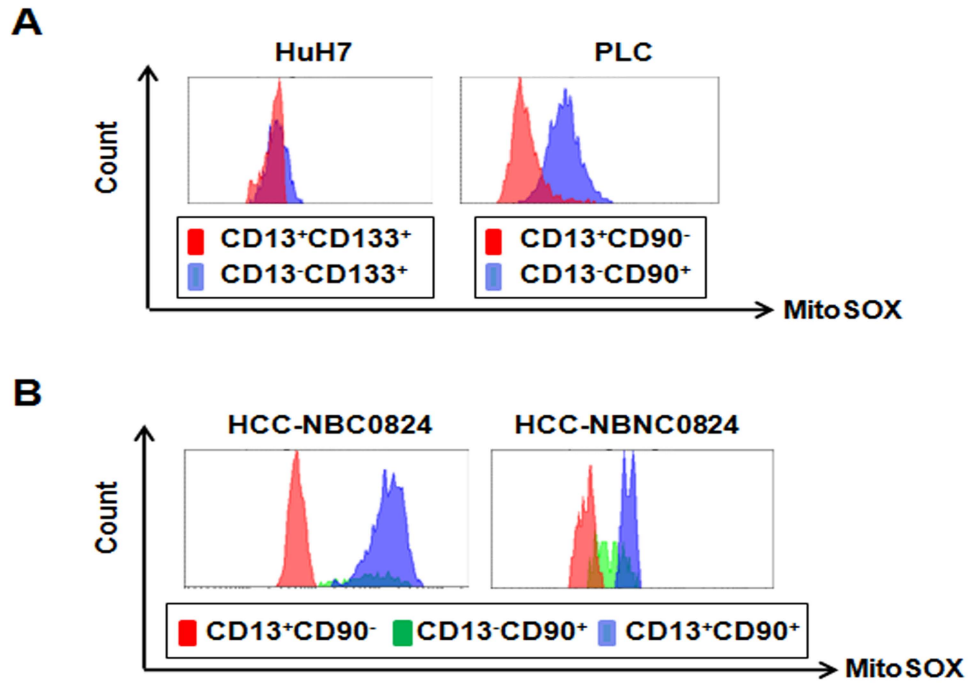



**Supplementary Table 1.** Lists of 56 up-regulated membrane associated genes in the SP cells

|           |           |                                                                                                                                                                        |
|-----------|-----------|------------------------------------------------------------------------------------------------------------------------------------------------------------------------|
| ANKRD3    | NM_020639 | Homo sapiens ankyrin repeat domain 3 (ANKRD3), mRNA                                                                                                                    |
| SLC15A2   | NM_021082 | Homo sapiens solute carrier family 15 (H+/peptide transporter), member 2 (SLC15A2), mRNA                                                                               |
| LCT       | NM_002299 | Homo sapiens lactase (LCT), mRNA                                                                                                                                       |
| FER1L3    | NM_133337 | Homo sapiens fer-1-like 3, myoferlin (C. elegans) (FER1L3), transcript variant 2, mRNA                                                                                 |
| GBP3      | NM_018284 | Homo sapiens guanylate binding protein 3 (GBP3), mRNA                                                                                                                  |
| PRO0659   | NM_014138 | Homo sapiens PRO0659 protein (PRO0659), mRNA                                                                                                                           |
| PECAM1    | NM_000442 | Homo sapiens platelet/endothelial cell adhesion molecule (CD31 antigen) (PECAM1), mRNA                                                                                 |
| CDKL5     | NM_003159 | Homo sapiens cyclin-dependent kinase-like 5 (CDKL5), mRNA                                                                                                              |
| CDH1      | NM_004360 | Homo sapiens cadherin 1, type 1, E-cadherin (epithelial) (CDH1), mRNA                                                                                                  |
| ANPEP     | NM_001150 | Homo sapiens alanyl (membrane) aminopeptidase (aminopeptidase N, aminopeptidase M, microsomal aminopeptidase, CD13, p150) (ANPEP), mRNA                                |
| SLC37A1   | NM_018964 | Homo sapiens solute carrier family 37 (glycerol-3-phosphate transporter), member 1 (SLC37A1), mRNA                                                                     |
| ABCC2     | NM_000392 | Homo sapiens ATP-binding cassette, sub-family C (CFTR/MRP), member 2 (ABCC2), mRNA                                                                                     |
| LRRC19    | NM_022901 | Homo sapiens hypothetical protein FLJ21302 (FLJ21302), mRNA                                                                                                            |
| OSTalpha  | NM_152672 | Homo sapiens organic solute transporter alpha (OSTalpha), mRNA                                                                                                         |
| UNC93A    | NM_018974 | Homo sapiens unc-93 homolog A (C. elegans) (UNC93A), mRNA                                                                                                              |
| JAG1      | NM_000214 | Homo sapiens jagged 1 (Alagille syndrome) (JAG1), mRNA                                                                                                                 |
| OSTbeta   | NM_178859 | Homo sapiens organic solute transporter beta (OSTbeta), mRNA                                                                                                           |
| FMOD      | NM_002023 | Homo sapiens fibromodulin (FMOD), mRNA                                                                                                                                 |
| ZDHHC14   | NM_024630 | Homo sapiens zinc finger, DHC domain containing 14 (ZDHHC14), mRNA                                                                                                     |
| PDZGEF1   | NM_014247 | Homo sapiens PDZ domain containing guanine nucleotide exchange factor (GEF) 1 (PDZGEF1), mRNA                                                                          |
| I_1002307 | I_1002307 | Phosphoinositide-3-kinase regulatory subunit 3, binds insulin receptor (INSR) and insulin-like growth factor receptor (IGF1R), may be involved in regulating signaling |
| UNC5CL    | NM_173561 | Homo sapiens unc-5 homolog C (C. elegans)-like (UNC5CL), mRNA                                                                                                          |
| TM4SF8    | NM_005724 | Homo sapiens tetraspan 3 (TSPAN-3), mRNA                                                                                                                               |
| ABCB1     | NM_000927 | Homo sapiens ATP-binding cassette, sub-family B (MDR/TAP), member 1 (ABCB1), mRNA                                                                                      |
| GPM6A     | NM_005277 | Homo sapiens glycoprotein M6A (GPM6A), mRNA                                                                                                                            |
| AK026443  | AK026443  | Homo sapiens cDNA: FLJ22790 fis, clone KAlA2176, highly similar to HUMPMA Human plasma membrane calcium-pumping ATPase (PMCA4) mRNA                                    |
| SLC2A9    | NM_020041 | Homo sapiens solute carrier family 2 (facilitated glucose transporter), member 9 (SLC2A9), mRNA                                                                        |
| CEACAM6   | NM_002483 | Homo sapiens carcinoembryonic antigen-related cell adhesion molecule 6 (non-specific cross reacting antigen) (CEACAM6), mRNA                                           |
| ATP1B1    | NM_001677 | Homo sapiens ATPase, Na+/K+ transporting, beta 1 polypeptide (ATP1B1), mRNA                                                                                            |
| SLC38A2   | NM_018976 | Homo sapiens solute carrier family 38, member 2 (SLC38A2), mRNA                                                                                                        |
| RNF19     | NM_015435 | Homo sapiens ring finger protein 19 (RNF19), mRNA                                                                                                                      |
| AB007935  | AB007935  | Homo sapiens mRNA for KIAA0466 protein, partial cds                                                                                                                    |
| C11orf11  | NM_006133 | Homo sapiens chromosome 11 open reading frame 11 (C11orf11), mRNA                                                                                                      |
| AK025431  | AK025431  | Homo sapiens cDNA: FLJ21778 fis, clone HEP00201                                                                                                                        |
| ABHD6     | NM_020676 | Homo sapiens abhydrolase domain containing 6 (ABHD6), mRNA                                                                                                             |
| SLCO2B1   | NM_007256 | Homo sapiens solute carrier family 21 (organic anion transporter), member 9 (SLC21A9), mRNA                                                                            |
| SAT2      | NM_133491 | Homo sapiens polyamine N-acetyltransferase (SSAT2), mRNA                                                                                                               |
| TNFSF10   | NM_003810 | Homo sapiens tumor necrosis factor (ligand) superfamily, member 10 (TNFSF10), mRNA                                                                                     |
| COL13A1   | NM_005203 | Homo sapiens collagen, type XIII, alpha 1 (COL13A1), transcript variant 1, mRNA                                                                                        |
| BC035618  | BC035618  | Homo sapiens somatostatin receptor 1, mRNA (cDNA clone MGC:45280 IMAGE:5175220), complete cds                                                                          |
| BC031313  | BC031313  | Homo sapiens solute carrier family 1 (glial high affinity glutamate transporter), member 2, mRNA (cDNA clone IMAGE:5276194), partial cds                               |
| ATP6V0A4  | NM_020632 | Homo sapiens ATPase, H+ transporting, lysosomal V0 subunit a isoform 4 (ATP6V0A4), transcript variant 1, mRNA                                                          |
| CA4       | NM_000717 | Homo sapiens carbonic anhydrase IV (CA4), mRNA                                                                                                                         |
| ABCG2     | NM_004827 | Homo sapiens ATP-binding cassette, sub-family G (WHITE), member 2 (ABCG2), mRNA                                                                                        |

**Supplementary Table 2.** Lists of 47 Antibodies Examined in the SP Screening

| Antibody  | Clone        | Source         | Antibody                 | Clone        | Source      |
|-----------|--------------|----------------|--------------------------|--------------|-------------|
| CD10      | eBioCB-CALLA | eBioscience    | CD164                    | N6B6         | BD          |
| CD13      | WM-15        | BD             | CD166                    | 3A6          | BD          |
| CD18      | CLB-LFA-1/1  | eBioscience    | CD167a                   | 51D6         | BioLegend   |
| CD24      | ML5          | BD             | CD184                    | 12G5         | eBioscience |
| CD26      | L272         | BD             | CD202b                   | 83715        | R&D         |
| CD29      | 4B4          | BECKMANCOULTER | CD227                    | HMPV         | BD          |
| CD31      | WM59         | eBioscience    | CD266                    | ITEM-4       | eBioscience |
| CD34      | 8G12         | BD             | CD321                    | WK9          | eBioscience |
| CD44      | G44-26       | BD             | CD324                    | 67A4         | BioLegend   |
| CD45      | HI30         | BD             | CD325                    | 401408       | R&D         |
| CD47      | HCD47        | BioLegend      | CD326                    | 1B7          | eBioscience |
| CD49f     | GoH3         | BD             | CD334                    | 4FR6D8       | BioLegend   |
| CD51/CD61 | 23C6         | BD             | CD339                    |              | ACR         |
| CD55      | IA10         | BD             | ABCG2                    | 5D3          | eBioscience |
| CD71      | M-A712       | BD             | Lin1(CD3,14,16,19,20,56) |              | BD          |
| CD90      | 5E10         | BioLegend      | c-Met                    | eBioclone 97 | eBioscience |
| CD104     | 439-9B       | BD             | aVb5 integrin            | P1F6         | CHEMICON    |
| CD106     | STA          | eBioscience    | MSC and NPC              | W4A5         | BioLegend   |
| CD115     | 12-3A3-1B10  | eBioscience    | NPC                      | 57D2         | BioLegend   |
| CD130     | AM64         | BD             | SSEA-4                   | MC-813-70    | BioLegend   |
| CD133/1   | 13A4         | eBioscience    | TRA-1-81                 | TRA-1-81     | BioLegend   |
| CD135     | BV10A4H2     | BioLegend      | hBMPR/ALK-3              |              | R&D         |
| CD144     | TEA1/31      | BECKMANCOULTER | ACE2                     | 171608       | R&D         |
| CD162     | KPL-1        | BD             |                          |              |             |
